# Supplementary material
Source: PubMed Central journal article supplement (PMC2736423)
Supplement: 0904833106_0904833106SI.pdf [file 0904833106_0904833106SI.pdf]

# Supporting Information

Han et al. 10.1073/pnas.0904833106

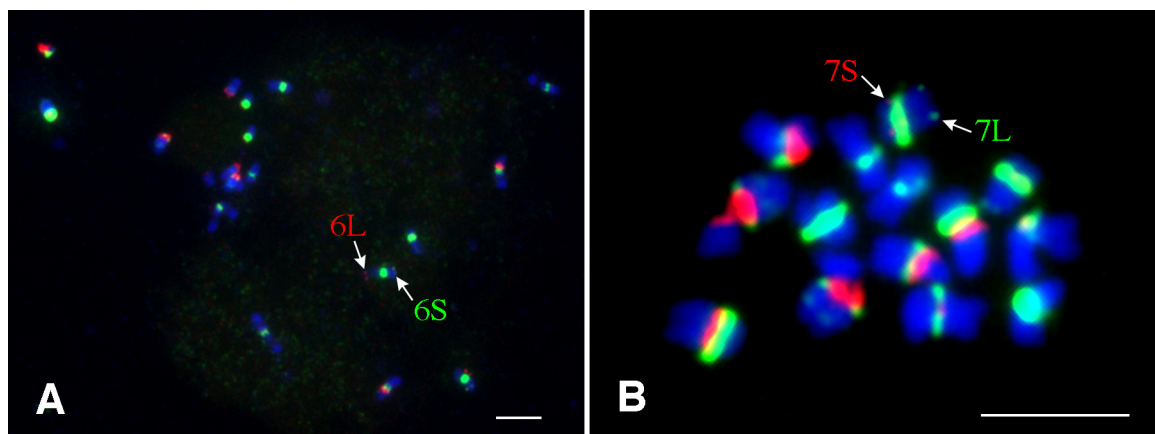

**Fig. S1.** Identification of cucumber chromosome 6 and 7. (A) Fosmid clones 6S and 6L, which were isolated using SSR markers mapped to cucumber linkage group 7, hybridized to cucumber chromosome 6 together with the centromere-specific Type III repeat (green) and 45S rDNA (red). (B) Fosmid clones 7S and 7L, which were isolated using SSR markers mapped to cucumber linkage group 3, hybridized to cucumber chromosome 7 together with the centromere-specific Type III repeat (green) and 45S rDNA (red). Chromosome nomenclature followed Han et al. (1). (Scale bars, 5  $\mu\text{m}$ .)

1. Han YH, et al. (2008) Distribution of the tandem repeat sequences and karyotyping in cucumber (*Cucumis sativus* L.) by fluorescence in situ hybridization *Cytogenet Genome Res* 122:80–88.

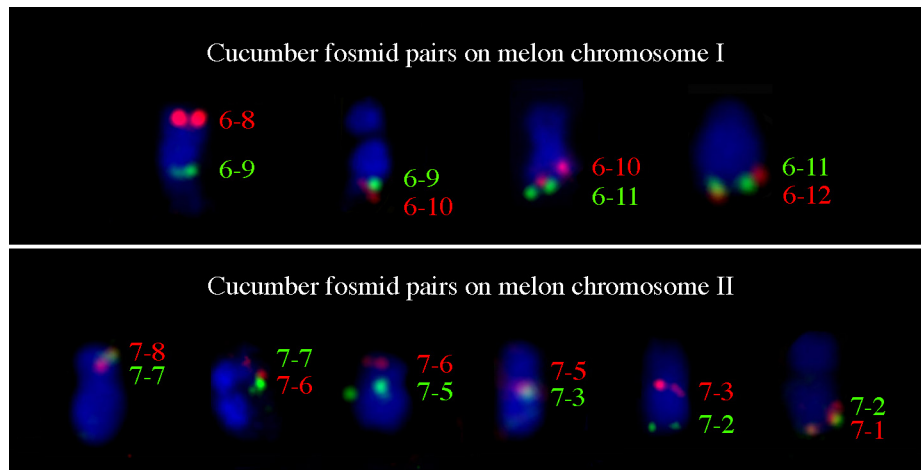

**Fig. S2.** FISH mapping of pairs of adjacent fosmid clones on specific melon chromosomes. The FISH results show the linkage of these pairs of cucumber fosmids on the same melon chromosomes.

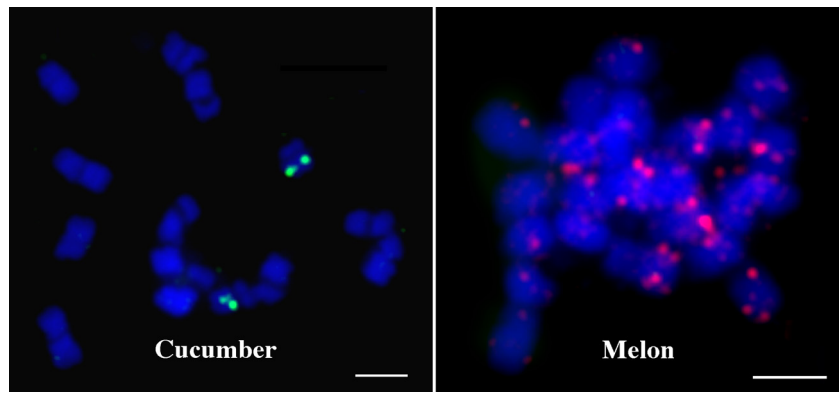

**Fig. S3.** FISH mapping of fosmid clone 7-4 on the somatic metaphase chromosomes of cucumber and melon, respectively. (Scale bars, 5  $\mu\text{m}$ .)

**Table S1. Genetic positions of SSR markers and chromosomal locations of fosmid clones anchored by the SSR markers in cucumber and melon**

| SSR marker | Genetic position (CM) | Fosmid code | Fosmid Name          | Physical location |                |
|------------|-----------------------|-------------|----------------------|-------------------|----------------|
|            |                       |             |                      | Cucumber Chro. 6  | Melon Chro. I  |
| SSR00158   | 1.8                   | 6-1         | gcfbe0.0620_F09.ab1  | 5.1               | -              |
| SSR11219   | 6.2                   | 6-2         | gcfbe0.0187_G09.ab1  | 10.2              | -              |
| SSR01903   | 10.8                  | 6-3         | gcfbe0.0459_C08.ab1  | 17.0              | -              |
| SSR02385   | 21.0                  | 6-4         | gcfbe0.0380_E04.ab1  | 27.8              | -              |
| SSR00647   | 30.4                  | 6-5         | rgcfbe0.0199_B05.ab1 | 38.5              | -              |
| SSR02086   | 39.6                  | 6-6         | gcfbd0.0868_F07.ab1  | 38.5/49.6         | -              |
| SSR00300   | 51.6                  | 6-7         | gcfbb0.0020_B11.ab1  | 62.9              | -              |
| SSR15199   | 62.4                  | 6-8         | rgcfbd0.0502_G07.ab1 | 71.9              | 10.2           |
| SSR13741   | 72.3                  | 6-9         | gcfbe0.0325_A08.ab1  | 77.3              | 56.8           |
| SSR02906   | 84.5                  | 6-10        | rgcfbe0.0257_E12.ab1 | 84.8              | 77.2           |
| SSR22498   | 95.8                  | 6-11        | gcfbd0.0199_C06.ab1  | 94.9              | 87.1           |
| SSR06271   | 106.5                 | 6-12        | gcfbd0.0131_G09.ab1  | 99.4              | 99.4           |
|            |                       |             |                      | Cucumber Chro. 7  | Melon Chro. II |
| SSR15477   | 0.0                   | 7-1         | gcfbe0.0624_A03.ab1  | 20.8              | 2.5            |
| SSR06585   | 7.0                   | 7-2         | rgcfba0.0055_H02.ab1 | 21.5              | 4.1            |
| SSR04584   | 14.7                  | 7-3         | rgcfbe0.0058_F08.ab1 | 47.3              | 38.5           |
| SSR11665   | 26.2                  | 7-4         | gcfbd0.0393_E02.ab1  | 59.0              | -              |
| SSR22097   | 36.5                  | 7-5         | gcfbd0.0214_B02.ab1  | 66.7              | 54.6           |
| SSR01898   | 51.8                  | 7-6         | gcfbd0.0343_F07.ab1  | 77.7              | 80.1           |
| SSR20122   | 61.0                  | 7-7         | rgcfbe0.0480_A04.ab1 | 95.9              | 99.4           |
| SSR17062   | 66.5                  | 7-8         | gcfbd0.0556_D09.ab1  | 94.3              | 97.1           |

Physical location measured by  $(S/T) \times 100$ , where  $S$  = the distance (in micrometers) from the FISH signal to the end of the short arm of the chromosome, and  $T$  = the total length of the chromosome (in micrometers).
